# Supplementary material for: The gold(iii)–CO bond: a missing piece in the gold carbonyl complex landscape
Source: Royal Society of Chemistry journal article supplement (doi:10.1039/c6cc09879g), 2017-01-01
Supplement: c6cc09879g2.pdf [file c6cc09879g2.pdf]

## SUPPORTING INFORMATION – XYZ STRUCTURES

### Bond analysis

56

[(N<sup>+</sup>C<sup>-</sup>N)Au(III)CO]<sup>+</sup> OPT C2v - Figure 1

|    |           |           |           |
|----|-----------|-----------|-----------|
| N  | 0.000000  | 0.000000  | 1.258783  |
| C  | 1.215366  | 0.000000  | 1.893205  |
| C  | 1.215727  | 0.000000  | 3.293623  |
| C  | 0.000000  | 0.000000  | 3.980650  |
| C  | -1.215727 | 0.000000  | 3.293623  |
| C  | -1.215366 | 0.000000  | 1.893205  |
| C  | 2.367224  | 0.000000  | 0.994432  |
| C  | 3.702240  | 0.000000  | 1.436796  |
| C  | 4.749633  | 0.000000  | 0.520720  |
| C  | 4.519776  | 0.000000  | -0.869845 |
| C  | 3.173766  | 0.000000  | -1.306186 |
| C  | 2.114445  | 0.000000  | -0.401346 |
| Au | 0.000000  | 0.000000  | -0.769057 |
| C  | 0.000000  | 0.000000  | -2.709855 |
| O  | 0.000000  | 0.000000  | -3.848038 |
| C  | -2.367224 | 0.000000  | 0.994432  |
| C  | -2.114445 | 0.000000  | -0.401346 |
| C  | -3.173766 | 0.000000  | -1.306186 |
| C  | -4.519776 | 0.000000  | -0.869845 |
| C  | -4.749633 | 0.000000  | 0.520720  |
| C  | -3.702240 | 0.000000  | 1.436796  |
| H  | 5.767466  | 0.000000  | 0.899580  |
| H  | 2.973756  | 0.000000  | -2.372228 |
| H  | 3.928708  | 0.000000  | 2.499773  |
| H  | 2.155938  | 0.000000  | 3.832889  |
| H  | -2.973756 | 0.000000  | -2.372228 |
| H  | 0.000000  | 0.000000  | 5.067326  |
| H  | -2.155938 | 0.000000  | 3.832889  |
| H  | -3.928708 | 0.000000  | 2.499773  |
| H  | -5.767466 | 0.000000  | 0.899580  |
| C  | -5.712656 | 0.000000  | -1.850487 |
| C  | 5.712656  | 0.000000  | -1.850487 |
| C  | 5.263488  | 0.000000  | -3.331713 |
| C  | 6.579473  | 1.270142  | -1.600374 |
| C  | 6.579473  | -1.270142 | -1.600374 |
| H  | 6.147692  | 0.000000  | -3.979070 |
| H  | 4.675162  | -0.891633 | -3.581832 |
| H  | 4.675162  | 0.891633  | -3.581832 |
| H  | 7.435315  | -1.273551 | -2.286680 |
| H  | 6.971592  | -1.301946 | -0.577711 |
| H  | 5.999701  | -2.185510 | -1.771844 |
| H  | 7.435315  | 1.273551  | -2.286680 |
| H  | 5.999701  | 2.185510  | -1.771844 |
| H  | 6.971592  | 1.301946  | -0.577711 |
| C  | -5.263488 | 0.000000  | -3.331713 |
| H  | -6.147692 | 0.000000  | -3.979070 |

|   |           |           |           |
|---|-----------|-----------|-----------|
| H | -4.675162 | 0.891633  | -3.581832 |
| H | -4.675162 | -0.891633 | -3.581832 |
| C | -6.579473 | 1.270142  | -1.600374 |
| C | -6.579473 | -1.270142 | -1.600374 |
| H | -6.971592 | -1.301946 | -0.577711 |
| H | -7.435315 | -1.273551 | -2.286680 |
| H | -5.999701 | -2.185510 | -1.771844 |
| H | -6.971592 | 1.301946  | -0.577711 |
| H | -5.999701 | 2.185510  | -1.771844 |
| H | -7.435315 | 1.273551  | -2.286680 |

68

**[(Idipp)Au(I)CO]<sup>+</sup> OPT C2V - Figure S1**

|    |           |           |           |
|----|-----------|-----------|-----------|
| N  | 0.000000  | 1.089867  | -2.880028 |
| C  | 0.000000  | 0.682223  | -4.207877 |
| C  | 0.000000  | -0.682223 | -4.207877 |
| N  | 0.000000  | -1.089867 | -2.880028 |
| C  | 0.000000  | 2.488528  | -2.442045 |
| C  | 0.000000  | -2.488528 | -2.442045 |
| C  | 0.000000  | 0.000000  | -2.057975 |
| Au | 0.000000  | 0.000000  | -0.003257 |
| C  | 0.000000  | 0.000000  | 1.964365  |
| O  | 0.000000  | 0.000000  | 3.100542  |
| H  | 0.000000  | -1.391384 | -5.021525 |
| H  | 0.000000  | 1.391384  | -5.021525 |
| C  | 1.244824  | -3.131590 | -2.255589 |
| C  | 1.209428  | -4.475593 | -1.849129 |
| C  | 0.000000  | -5.139728 | -1.647083 |
| C  | -1.209428 | -4.475593 | -1.849129 |
| C  | -1.244824 | -3.131590 | -2.255589 |
| C  | 2.594396  | -2.443528 | -2.491837 |
| H  | 2.143486  | -5.009586 | -1.694147 |
| H  | 0.000000  | -6.181065 | -1.335224 |
| H  | -2.143486 | -5.009586 | -1.694147 |
| C  | -2.594396 | -2.443528 | -2.491837 |
| C  | -1.244824 | 3.131590  | -2.255589 |
| C  | -1.209428 | 4.475593  | -1.849129 |
| C  | 0.000000  | 5.139728  | -1.647083 |
| C  | 1.209428  | 4.475593  | -1.849129 |
| C  | 1.244824  | 3.131590  | -2.255589 |
| C  | -2.594396 | 2.443528  | -2.491837 |
| H  | -2.143486 | 5.009586  | -1.694147 |
| H  | 0.000000  | 6.181065  | -1.335224 |
| H  | 2.143486  | 5.009586  | -1.694147 |
| C  | 2.594396  | 2.443528  | -2.491837 |
| H  | -2.407478 | -1.395759 | -2.749207 |
| C  | -3.351351 | -3.077141 | -3.689066 |
| C  | -3.477524 | -2.445014 | -1.218513 |
| C  | 3.351351  | -3.077141 | -3.689066 |
| H  | 2.407478  | -1.395759 | -2.749207 |
| C  | 3.477524  | -2.445014 | -1.218513 |
| C  | -3.477524 | 2.445014  | -1.218513 |
| C  | -3.351351 | 3.077141  | -3.689066 |
| H  | -2.407478 | 1.395759  | -2.749207 |
| H  | 2.407478  | 1.395759  | -2.749207 |
| C  | 3.351351  | 3.077141  | -3.689066 |

|   |           |           |           |
|---|-----------|-----------|-----------|
| C | 3.477524  | 2.445014  | -1.218513 |
| H | -4.407759 | -1.894722 | -1.405485 |
| H | -3.749348 | -3.463652 | -0.918074 |
| H | -2.963265 | -1.971619 | -0.373197 |
| H | -4.286364 | -2.533953 | -3.873936 |
| H | -2.751540 | -3.047783 | -4.606586 |
| H | -3.605564 | -4.124955 | -3.489121 |
| H | -4.407759 | 1.894722  | -1.405485 |
| H | -2.963265 | 1.971619  | -0.373197 |
| H | -3.749348 | 3.463652  | -0.918074 |
| H | -4.286364 | 2.533953  | -3.873936 |
| H | -3.605564 | 4.124955  | -3.489121 |
| H | -2.751540 | 3.047783  | -4.606586 |
| H | 4.407759  | 1.894722  | -1.405485 |
| H | 3.749348  | 3.463652  | -0.918074 |
| H | 2.963265  | 1.971619  | -0.373197 |
| H | 4.286364  | 2.533953  | -3.873936 |
| H | 2.751540  | 3.047783  | -4.606586 |
| H | 3.605564  | 4.124955  | -3.489121 |
| H | 4.286364  | -2.533953 | -3.873936 |
| H | 3.605564  | -4.124955 | -3.489121 |
| H | 2.751540  | -3.047783 | -4.606586 |
| H | 4.407759  | -1.894722 | -1.405485 |
| H | 2.963265  | -1.971619 | -0.373197 |
| H | 3.749348  | -3.463652 | -0.918074 |

## Mechanistic analysis

### Reactant complex (Anion=triflate)

43

#### Au(III) - Figure S4

|   |           |          |           |
|---|-----------|----------|-----------|
| C | -0.127786 | 6.074807 | -1.785037 |
| C | 1.183144  | 5.641858 | -1.449857 |
| C | 2.300545  | 6.260644 | -2.034147 |
| C | 2.121689  | 7.296201 | -2.948452 |
| C | 0.830566  | 7.722263 | -3.275091 |
| C | -0.290130 | 7.117743 | -2.690575 |
| C | 1.291180  | 4.564570 | -0.470839 |
| C | 2.455928  | 3.992158 | 0.054932  |
| C | 2.348332  | 2.972240 | 0.999571  |
| C | 1.099476  | 2.516474 | 1.425295  |
| C | -0.056189 | 3.096941 | 0.892843  |
| N | 0.094827  | 4.086341 | -0.029653 |
| C | -1.449395 | 2.772163 | 1.199726  |
| C | -2.447283 | 3.552415 | 0.551728  |
| C | -3.789771 | 3.258992 | 0.783481  |
| C | -4.147906 | 2.219371 | 1.654273  |
| C | -3.165635 | 1.463226 | 2.300299  |

|    |           |           |           |
|----|-----------|-----------|-----------|
| C  | -1.817646 | 1.736820  | 2.073249  |
| Au | -1.567656 | 5.006710  | -0.688609 |
| C  | -3.150418 | 5.905065  | -1.365253 |
| O  | -4.070393 | 6.242002  | -1.946736 |
| H  | 2.989195  | 7.779417  | -3.399589 |
| H  | -1.283727 | 7.499338  | -2.921036 |
| H  | 3.310279  | 5.938823  | -1.771890 |
| H  | 3.429877  | 4.352499  | -0.270643 |
| H  | -4.572819 | 3.854368  | 0.313444  |
| H  | 3.253327  | 2.527072  | 1.415784  |
| H  | 1.016593  | 1.724667  | 2.167409  |
| H  | -1.053570 | 1.139748  | 2.574950  |
| H  | -3.450357 | 0.659461  | 2.980462  |
| H  | -5.203854 | 2.005361  | 1.830239  |
| H  | 0.691060  | 8.543615  | -3.980436 |
| O  | -4.428736 | 6.202749  | 1.117958  |
| H  | -4.191248 | 7.136540  | 1.326258  |
| H  | -3.869333 | 5.704189  | 1.740329  |
| O  | -1.075308 | 6.909254  | 1.204764  |
| S  | -1.857732 | 8.098895  | 0.811698  |
| O  | -2.322242 | 8.081435  | -0.594602 |
| O  | -2.872892 | 8.524235  | 1.780307  |
| C  | -0.586708 | 9.481122  | 0.819265  |
| F  | 0.422720  | 9.199478  | -0.039037 |
| F  | -1.144836 | 10.650706 | 0.444847  |
| F  | -0.060382 | 9.632912  | 2.053029  |

29

**Au(I) - Figure S4**

|    |          |           |           |
|----|----------|-----------|-----------|
| C  | 1.219749 | 0.477324  | 8.792624  |
| N  | 2.207835 | 0.579280  | 9.751927  |
| C  | 2.982371 | -0.536284 | 9.755883  |
| N  | 2.480722 | -1.330362 | 8.774926  |
| C  | 1.391569 | -0.728935 | 8.176755  |
| C  | 2.286215 | 1.628278  | 10.765669 |
| Au | 4.451309 | -0.997472 | 11.070440 |
| C  | 5.887175 | -1.425154 | 12.325365 |
| O  | 6.793701 | -1.635167 | 12.984021 |
| C  | 2.891342 | -2.716110 | 8.564583  |
| O  | 4.000946 | -2.283645 | 13.863725 |
| H  | 0.474111 | 1.248747  | 8.647051  |
| H  | 0.821120 | -1.213773 | 7.394726  |
| H  | 3.327004 | -1.568713 | 13.899226 |
| H  | 3.524270 | -2.918797 | 13.279991 |
| H  | 1.738853 | 2.507801  | 10.409016 |
| H  | 1.846804 | 1.248444  | 11.698762 |
| H  | 3.336911 | 1.894529  | 10.932187 |
| H  | 2.538287 | -3.047227 | 7.581611  |
| H  | 3.985591 | -2.778553 | 8.600596  |
| H  | 2.460000 | -3.337547 | 9.361907  |
| O  | 1.671123 | -0.871274 | 12.821415 |
| S  | 1.134882 | -2.026317 | 12.065871 |
| O  | 0.319874 | -1.685179 | 10.901469 |
| O  | 2.129755 | -3.101981 | 11.841333 |

|   |           |           |           |
|---|-----------|-----------|-----------|
| C | -0.074055 | -2.806009 | 13.272315 |
| F | -0.643283 | -3.906019 | 12.732519 |
| F | 0.558328  | -3.171390 | 14.411262 |
| F | -1.055197 | -1.934461 | 13.593665 |

### Transition State (Anion=Triflate)

29

#### Au(I) - Figure S4

|    |           |           |           |
|----|-----------|-----------|-----------|
| N  | 1.638528  | -0.089811 | 9.033149  |
| C  | 2.770690  | -0.849256 | 9.002118  |
| N  | 3.312361  | -0.619223 | 7.770346  |
| C  | 2.532142  | 0.266956  | 7.045730  |
| C  | 1.475758  | 0.597766  | 7.842560  |
| Au | 3.462058  | -2.084581 | 10.475874 |
| C  | 4.059161  | -3.352943 | 11.945992 |
| O  | 4.518225  | -4.437019 | 12.022294 |
| C  | 4.551832  | -1.219340 | 7.282936  |
| C  | 0.692231  | -0.033289 | 10.151472 |
| O  | 3.728671  | -2.730544 | 13.426754 |
| O  | 1.478568  | -3.353779 | 14.131544 |
| S  | 0.604216  | -2.127119 | 13.901229 |
| C  | 0.203001  | -1.608846 | 15.665439 |
| F  | -0.562312 | -0.497845 | 15.646471 |
| O  | 1.390132  | -1.011358 | 13.355064 |
| O  | -0.668383 | -2.441729 | 13.288262 |
| F  | -0.465608 | -2.584441 | 16.306928 |
| F  | 1.336290  | -1.338604 | 16.347660 |
| H  | 0.634245  | 1.257268  | 7.664630  |
| H  | 2.791967  | 0.586873  | 6.043275  |
| H  | 3.481803  | -1.790218 | 13.263671 |
| H  | 2.655773  | -3.123540 | 13.813728 |
| H  | 0.412387  | 1.011654  | 10.335375 |
| H  | -0.206162 | -0.619649 | 9.916530  |
| H  | 1.162285  | -0.444040 | 11.052704 |
| H  | 5.287386  | -0.436124 | 7.054571  |
| H  | 4.946699  | -1.872195 | 8.069716  |
| H  | 4.354618  | -1.813723 | 6.380566  |

### Product complex (Anion=triflate)

43

#### Au(III) - Figure S4

|   |           |          |          |
|---|-----------|----------|----------|
| N | -0.131950 | 0.914535 | 0.033259 |
| C | 0.832162  | 1.772111 | 0.447205 |
| C | 0.455886  | 3.095008 | 0.717501 |
| C | -0.879232 | 3.464930 | 0.540012 |
| C | -1.834117 | 2.546741 | 0.096328 |

|    |           |           |           |
|----|-----------|-----------|-----------|
| C  | -1.434112 | 1.229732  | -0.166967 |
| C  | 2.167535  | 1.162680  | 0.544049  |
| C  | 3.287409  | 1.870764  | 1.008222  |
| C  | 4.527378  | 1.238088  | 1.094375  |
| C  | 4.650726  | -0.105313 | 0.726323  |
| C  | 3.537218  | -0.820469 | 0.263282  |
| C  | 2.290843  | -0.206076 | 0.156633  |
| Au | 0.454531  | -0.993551 | -0.449459 |
| C  | 1.080921  | -2.841441 | -0.983006 |
| O  | 1.740886  | -3.624506 | -0.359133 |
| C  | -2.253673 | 0.103585  | -0.643625 |
| C  | -1.594072 | -1.146440 | -0.862909 |
| C  | -2.364401 | -2.238640 | -1.267124 |
| C  | -3.745126 | -2.109200 | -1.479040 |
| C  | -4.378201 | -0.879781 | -1.282097 |
| C  | -3.635157 | 0.222978  | -0.858656 |
| H  | 5.395931  | 1.790753  | 1.455493  |
| H  | 3.644908  | -1.873453 | -0.003099 |
| H  | 3.193815  | 2.915786  | 1.311489  |
| H  | 1.194695  | 3.820601  | 1.053593  |
| H  | -1.911440 | -3.222247 | -1.401950 |
| H  | -1.181578 | 4.493054  | 0.746420  |
| H  | -2.870569 | 2.847965  | -0.046113 |
| H  | -4.139250 | 1.176846  | -0.688980 |
| H  | -5.452126 | -0.780918 | -1.446814 |
| H  | -4.323818 | -2.980079 | -1.792757 |
| H  | 5.620277  | -0.602147 | 0.801641  |
| O  | 0.701910  | -3.204585 | -2.295061 |
| H  | 0.578163  | -4.768989 | -2.737680 |
| H  | 0.060272  | -2.546408 | -2.635027 |
| O  | 0.433677  | -5.704836 | -3.113489 |
| S  | -1.064125 | -6.150321 | -2.898298 |
| O  | -1.145268 | -7.570830 | -3.102238 |
| O  | -1.644327 | -5.491657 | -1.747367 |
| C  | -1.867820 | -5.340639 | -4.396146 |
| F  | -1.373962 | -5.838227 | -5.538369 |
| F  | -3.194544 | -5.548901 | -4.356142 |
| F  | -1.638529 | -4.003024 | -4.369569 |

29

**Au(I)- Figure S4**

|    |          |           |           |
|----|----------|-----------|-----------|
| C  | 1.367101 | 0.499209  | 7.934392  |
| N  | 1.642605 | -0.106855 | 9.148604  |
| C  | 2.799454 | -0.824780 | 9.084972  |
| N  | 3.243639 | -0.649739 | 7.806703  |
| C  | 2.380456 | 0.160110  | 7.085605  |
| C  | 0.781441 | -0.039324 | 10.330141 |
| Au | 3.627544 | -1.965639 | 10.564363 |
| C  | 4.358239 | -3.185880 | 12.026368 |
| O  | 4.836872 | -4.280326 | 11.992091 |
| C  | 4.469971 | -1.236610 | 7.277138  |
| O  | 4.125098 | -2.664314 | 13.427696 |
| H  | 0.488312 | 1.113856  | 7.779605  |
| H  | 2.560180 | 0.427856  | 6.051183  |

|   |           |           |           |
|---|-----------|-----------|-----------|
| H | 3.900438  | -1.712075 | 13.317786 |
| H | 2.809997  | -3.089862 | 13.787634 |
| H | 0.232469  | 0.909554  | 10.316343 |
| H | 0.073254  | -0.877940 | 10.340055 |
| H | 1.399408  | -0.094213 | 11.232519 |
| H | 5.163156  | -0.445503 | 6.961292  |
| H | 4.930731  | -1.830166 | 8.075137  |
| H | 4.238570  | -1.888053 | 6.424002  |
| O | 1.844931  | -0.838997 | 13.441348 |
| S | 0.950785  | -1.953610 | 13.739588 |
| O | -0.230120 | -2.168430 | 12.937340 |
| O | 1.748467  | -3.271294 | 13.930428 |
| C | 0.347185  | -1.665025 | 15.496780 |
| F | -0.415061 | -2.691760 | 15.905879 |
| F | 1.395022  | -1.532348 | 16.330409 |
| F | -0.382833 | -0.533810 | 15.525439 |

### Distance C(CO)-O(H2O) 1.8 Å (Anion=triflate)

43

#### Au(III) - Figure S5

|    |           |          |           |
|----|-----------|----------|-----------|
| C  | -0.452644 | 5.932293 | -2.169280 |
| C  | 0.905108  | 5.655465 | -1.847742 |
| C  | 1.938248  | 6.283468 | -2.558545 |
| C  | 1.636428  | 7.177080 | -3.585480 |
| C  | 0.303063  | 7.446707 | -3.905645 |
| C  | -0.735591 | 6.826054 | -3.198225 |
| C  | 1.149003  | 4.720874 | -0.746691 |
| C  | 2.373832  | 4.365289 | -0.172762 |
| C  | 2.385006  | 3.493742 | 0.916104  |
| C  | 1.197385  | 2.978974 | 1.438763  |
| C  | -0.017828 | 3.342605 | 0.849747  |
| N  | 0.022127  | 4.172345 | -0.224413 |
| C  | -1.372475 | 2.959745 | 1.261254  |
| C  | -2.454435 | 3.555743 | 0.554253  |
| C  | -3.758844 | 3.227376 | 0.916167  |
| C  | -4.002637 | 2.326844 | 1.962915  |
| C  | -2.938241 | 1.746207 | 2.657453  |
| C  | -1.625138 | 2.060561 | 2.307656  |
| Au | -1.744731 | 4.877470 | -0.907004 |
| C  | -3.450906 | 5.701125 | -1.463571 |
| O  | -4.314288 | 5.672534 | -2.242844 |
| H  | 2.442000  | 7.666892 | -4.134053 |
| H  | -1.768896 | 7.059662 | -3.459942 |
| H  | 2.981535  | 6.077700 | -2.311484 |
| H  | 3.298899  | 4.789933 | -0.557836 |
| H  | -4.606777 | 3.668755 | 0.388963  |
| H  | 3.335821  | 3.224580 | 1.378583  |
| H  | 1.207540  | 2.321408 | 2.305987  |
| H  | -0.797583 | 1.601826 | 2.852411  |
| H  | -3.131293 | 1.048672 | 3.473522  |
| H  | -5.030504 | 2.081188 | 2.237121  |

|   |           |          |           |
|---|-----------|----------|-----------|
| H | 0.066817  | 8.149614 | -4.706893 |
| O | -3.739045 | 7.042086 | -0.284437 |
| H | -2.890120 | 7.644196 | -0.351822 |
| H | -3.494648 | 6.659139 | 0.614938  |
| O | -2.123679 | 6.586857 | 1.813202  |
| S | -1.049748 | 7.467067 | 1.292083  |
| O | 0.287347  | 6.894870 | 1.266731  |
| O | -1.465369 | 8.174453 | 0.043811  |
| C | -0.961014 | 8.855515 | 2.550841  |
| F | -0.619227 | 8.367532 | 3.761386  |
| F | -0.041163 | 9.769258 | 2.180149  |
| F | -2.158547 | 9.471184 | 2.659288  |

29

**Au(I) - Figure S5**

|    |           |           |           |
|----|-----------|-----------|-----------|
| C  | 1.199890  | 0.471463  | 8.467923  |
| N  | 1.909496  | 0.326199  | 9.646016  |
| C  | 2.866139  | -0.630521 | 9.516370  |
| N  | 2.751143  | -1.075903 | 8.233376  |
| C  | 1.728387  | -0.413694 | 7.574434  |
| C  | 1.634941  | 1.080911  | 10.867336 |
| Au | 4.093773  | -1.355044 | 10.958011 |
| C  | 5.267714  | -2.148077 | 12.389451 |
| O  | 6.337905  | -2.526806 | 12.643662 |
| C  | 3.551389  | -2.149157 | 7.654528  |
| O  | 4.215772  | -2.445193 | 13.836252 |
| H  | 0.384161  | 1.177415  | 8.369310  |
| H  | 1.463083  | -0.631349 | 6.546868  |
| H  | 3.593306  | -1.653256 | 13.877537 |
| H  | 3.518585  | -3.097274 | 13.494063 |
| H  | 1.925517  | 2.131158  | 10.729468 |
| H  | 0.567994  | 1.001893  | 11.104275 |
| H  | 2.194434  | 0.631152  | 11.693817 |
| H  | 3.992130  | -1.817211 | 6.705546  |
| H  | 4.349367  | -2.398380 | 8.363158  |
| H  | 2.927756  | -3.037093 | 7.485179  |
| O  | 2.014636  | -0.971533 | 13.417767 |
| S  | 1.213793  | -2.080376 | 12.826876 |
| O  | 0.478681  | -1.737875 | 11.616359 |
| O  | 1.959047  | -3.361890 | 12.792536 |
| C  | -0.112667 | -2.377140 | 14.120889 |
| F  | -0.920940 | -3.389234 | 13.745762 |
| F  | 0.446774  | -2.692672 | 15.309329 |
| F  | -0.864895 | -1.266480 | 14.284744 |
